# Top-down regression of the avian oviduct during late oviposition in a small passerine bird

T. D. Williams\* and C. E. Ames

Department of Biological Sciences, Simon Fraser University, 8888 University Drive, Burnaby, V5A 1S6, Canada

\*Author for correspondence (e-mail: tdwillia@sfu.ca)

Accepted 3 October 2003

## Summary

Egg production in oviparous vertebrates is assumed to be costly but the physiological basis of any costs remains unknown. The avian oviduct is a highly differentiated linear organ, with five functionally specific regions. Here we show that the oviduct regresses rapidly ‘from the top down’ as soon as the more proximal regions have completed their function but while the distal regions still retain an oviductal egg. In zebra finches *Taeniopygia guttata*, oviduct mass did not differ between early laying birds at the 1-egg stage compared with late-laying birds (with one remaining yolky follicle; dry mass, 151–167 mg). However, in birds with no remaining yolky follicles but with an oviductal egg, oviduct mass decreased to 94 mg (44%). Regression occurred unequally among different regions of the oviduct, with significant decreases in the

proximal infundibulum/magnum and isthmus regions (59% and 40%, respectively), but no change in distal shell gland/vagina mass. The shell gland did not regress until after the last oviposition. Thus, the avian oviduct has a highly regulated size–function relationship consistent with a high maintenance energy cost for this organ. We suggest that oviduct function is a significant contributor to the physiological costs of egg production and might mediate individual variation in maternal effects associated with non-yolk components of egg quality (e.g. immunoglobulins, lysozyme).

Key words: cost of egg production, oviduct, organ size–function relationship, maternal effect, *Taeniopygia guttata*.

## Introduction

Egg production in birds is widely assumed to be energetically costly (e.g. Stevenson and Bryant, 2000; Nager et al., 2000; Nilsson and Raberg, 2001; Visser and Lessells, 2001) but currently little is known about the specific processes, or components of the reproductive axis, which form the physiological basis for these costs (Carey, 1996; Monaghan and Nager, 1997; Nilsson and Raberg, 2001; Vézina and Williams, 2002). Most studies to date have focussed on ovarian processes in relation to differential patterns of female reproductive effort, e.g. follicle development, yolk precursor synthesis and uptake (Challenger et al., 2001; Christians and Williams, 2001), or transfer of steroid hormones from mother to offspring *via* yolk (e.g. Schwabl, 1993, 1996; Muller et al., 2002). In contrast, the relative importance of extra-ovarian components of the female reproductive system have rarely been considered in relation to parent–offspring interactions or in mediating variation in maternal effects (however, see Saino et al., 2001, 2002).

Recent studies have suggested that the oviduct might have high energy costs for growth and/or maintenance, contributing substantially to the energetic cost of reproduction. For example, in breeding European starlings *Sturnus vulgaris* egg production was associated with a 22% increase in resting metabolic rate (RMR; Vézina and Williams, 2002; see also

Nilsson and Raberg, 2001), and oviduct mass was the only organ that explained variation in RMR among laying females (Vézina and Williams, 2003). Similarly, in house sparrows *Passer domesticus*, Chappell et al. (1999) found that basal metabolic rate (BMR) was positively correlated with combined dry ovary and oviduct mass. While these studies suggest potential ‘costs’ to individuals with large oviducts, Christians and Williams (1999) reported a positive relationship between albumen protein content of eggs and oviduct mass, i.e. individuals with larger oviducts might benefit in being able to produce higher quality eggs (Williams, 1994). Given these identifiable costs and benefits, this predicts that oviduct size should be tightly coupled to the functional demands of this organ (*sensu* Diamond and Hammond, 1992). In support of this idea, Vézina and Williams (2003) found that total oviduct mass decreased by 47% immediately following ovulation of the last ovarian follicle even though an oviductal egg was still present at this point (though they did not identify which component(s) of the oviduct accounted for this decrease in mass).

The oviduct of oviparous vertebrates is a highly differentiated organ, with five anatomically and functionally distinct regions (King and McLelland, 1984; Palmer and Guillette, 1988). In poultry, an egg takes approx. 25 h to pass down the entire length of the oviduct, but spends most time

(approx. 20 h) in the distal shell gland and relatively little time in the proximal magnum and isthmus regions where albumen and shell membrane formation occur (Solomon, 1983; Bakst, 1998). Here, in zebra finches *Taeniopygia guttata*, we demonstrate that the oviduct does have a highly regulated size–function relationship. Specifically, this linear organ regresses very rapidly at the end of egg-laying from the top down as soon as the more proximal regions have completed their function but while the distal regions are still functional. This would minimize the time that the different components of this organ are maintained in a functional state, and thus reduce the energy cost of maintaining the complete oviduct.

## Materials and methods

### *Animals and husbandry*

Zebra finches *Taeniopygia guttata* Vieillot were maintained in controlled environmental conditions (temperature 19–23°C; humidity 35–55%; constant light schedule of 14 h:10 h L:D, lights on at 07:00 h). All birds had access *ad libitum* to a mixed seed diet (Panicum and white millet, 50:50 w/w, approximately 12.0% protein and 0.6% lipid and 84% carbohydrate by dry mass), water, grit and cuttlefish bone (calcium), and were given a multivitamin supplement once per week. Birds were kept in single-sex cages when not being bred (approx. 35 birds/triple cage). Breeding pairs were housed individually in single cages (61 cm×46 cm×41 cm), each with an external nest box (11.5 cm×11.5 cm×11.5 cm). Most breeding pairs ( $N=58$ ) were given an egg-food supplement from pairing throughout laying (high-quality diet or HQD; 6 g day<sup>-1</sup>; 20.3% protein and 6.6% lipid). The remaining breeding pairs ( $N=6$ ) were not given egg food during laying (low quality diet or LQD). The HQD is the standard breeding diet in our laboratory, but we included the LQD treatment to allow direct comparison to the study of Houston et al. (1995). Experiments and animal husbandry were carried out under a Simon Fraser University Animal Care Committee permit (no. 558B), in accordance with guidelines from the Canadian Committee on Animal Care (CCAC).

### *Experimental treatments*

Birds were assigned to breeding pairs randomly and all males and females used in this experiment had bred previously. Nest boxes were checked daily between 09:00 h and 11:00 h and any newly laid eggs were weighed ( $\pm 0.001$  g) and numbered. Laying females were collected for body composition analysis between 07:00 h and 07.15 h on the day after laying a specific number of eggs. Laying females were killed by exsanguination under anaesthetic (Rompun/Ketamine, 1:1 v/v), the oviduct was dissected out, and the oviductal egg removed. We chose this collection time because 95% of eggs are laid within 2 h of lights on in zebra finches (Christians and Williams, 2001) with ovulation occurring 30–45 min after oviposition (Etches, 1996). Thus, birds ovipositing on the day of collection had an almost fully formed oviductal egg in the distal shell gland region. This allowed us to dissect out the oviductal egg without the risk of confounding

oviduct mass by the presence of luminal albumen from developing eggs. Although intra-cellular albumen content in the oviduct might have varied with time of day, since all birds were collected at the same time, and given the short time window of oviposition, this would not confound our subsequent analyses. Females were then categorized into different stages of ovarian (follicle) development, based on the number of yolky follicles in their ovary and the presence of an oviductal egg: (1) 1-egg birds ( $N=10$ ) that had laid only their first egg and had a full follicle hierarchy of  $>3$  follicles; (2) birds with 2–3 remaining yolky follicles that had laid 3+ eggs (mean=3.8 $\pm$ 0.8) and had an oviductal egg ( $N=9$ ); (3) birds with only one remaining yolky follicle that had laid 3+ eggs (mean=3.9 $\pm$ 0.3) and had an oviductal egg ( $N=13$ ); (4) birds with no remaining yolky follicles that had laid 4+ eggs (mean=4.3 $\pm$ 0.5) and still had an oviductal egg ( $N=15$ ); and (5) birds at clutch completion with no yolky follicles and no oviductal egg ( $N=8$ ; mean clutch size 4.8 $\pm$ 0.9). All females were weighed ( $\pm 0.1$  g) at pairing, at the 1-egg stage and/or on the day they were collected. In addition we collected the first and last egg that each female laid for analysis of egg composition (first eggs were replaced with ‘dummy’ eggs to maintain clutch size). Eggs were boiled for 1–2 min and frozen at  $-20^{\circ}\text{C}$  until further analysis. Subsequently each egg was separated into shell, albumen and yolk, each component was dried to constant weight at  $60^{\circ}\text{C}$  and weighed ( $\pm 0.001$  g).

### *Oviduct analysis*

We divided the oviduct into three sections based on King and McLelland (1984): (a) infundibulum/magnum: we pooled these sections since the junction between the infundibulum and magnum was not easily discernable, and the infundibulum on average represented only 6.9 $\pm$ 0.6% of the combined mass; (b) isthmus: we separated the proximal end of the isthmus from the magnum at the sharply distinguished translucent band of tissue, and the distal end of the isthmus from the uterus at the ‘red region’; and (c) shell gland (uterus)/vagina. Each section was subsequently dried to constant mass at  $60^{\circ}\text{C}$  and weighed again ( $\pm 0.001$  g). We report data for dry oviduct mass throughout: we did not lipid-extract oviduct tissue because this contains a negligible amount of lipid (e.g. 3.9%, F. Vézina, unpublished data; see also Houston et al., 1995).

## Results

Body mass varied with stage of ovarian development ( $F_{4,54}=4.07$ ,  $P<0.01$ ), decreasing from 16.6 $\pm$ 0.4 g to 14.1 $\pm$ 0.5 g between the 1-egg stage and clutch completion. Dry oviduct mass was positively related to body mass ( $F_{1,54}=34.2$ ,  $P<0.001$ ,  $r^2=0.39$ ), therefore we controlled for body mass (minus organ mass; Christians, 1999) in all subsequent analyses. Diet had a marginally significant effect on oviduct mass in late laying birds: LQD, 151 $\pm$ 8 mg,  $N=4$ , vs. HQD, 170 $\pm$ 4 mg,  $N=16$  ( $F_{2,19}=4.18$ ,  $P=0.06$ ; these birds had all ovulated  $\geq 3$  eggs and had only 1–2 yolky follicles). We only

had data from two birds on the LQD with an oviductal egg and no remaining yolky follicles, but oviduct masses in these birds (73 mg, 112 mg) were similar to those in birds on the HQD at this stage (mean 91 mg, range 75–127 mg,  $N=15$ ).

Total dry oviduct mass varied with stage of ovarian development ( $F_{5,54}=31.9$ ,  $P<0.001$ , controlling for body mass; Fig. 1). Oviduct mass did not differ between birds at the 1-egg stage (with a full follicle hierarchy) and late-laying birds that had ovulated 3–5 follicles and had only one yolky follicle remaining ( $153\pm 8$  vs.  $167\pm 7$  mg;  $P>0.90$ ). However, oviduct mass then decreased by 44%, to  $94\pm 6$  mg in birds with no remaining yolky follicles but still with an oviductal egg ( $P<0.001$ ), and then decreased further to  $55\pm 10$  mg in birds with no oviductal egg, i.e. in birds at clutch completion ( $P<0.01$ ).

This reduction in oviduct dry mass over the cycle of ovarian development occurred unequally among the different regions of the oviduct (Fig. 2). The mass of the proximal infundibulum/magnum regions and the isthmus region decreased by 56% and 38%, respectively, when birds with one yolky follicle were compared with those with no yolky follicles and only an oviductal egg (Fig. 2A,B;  $P<0.001$  in both cases). In contrast, there was no change in mass of the shell gland/vagina at this stage (paired contrast,  $P>0.90$ ). Rather, shell gland/vagina mass only decreased (by 34%) 24 h later, after the last egg had been laid, i.e. in birds at clutch completion with no oviductal egg (Fig. 2C;  $P<0.001$ ). Thus, regression of the oviduct was initiated first, and occurred most rapidly, in the proximal regions of the organ, but was delayed in the distal section until after the last oviposition. As a consequence, the relative morphology of this organ changed with stage of ovarian development. As laying progressed the relative contribution of the infundibulum/magnum regions decreased from  $66.6\pm 7.1\%$  of total oviduct mass at the 1-egg stage to  $52.5\pm 3.6\%$  in birds that had completed their last ovulation but still retained an oviductal egg. Conversely, the relative contribution of the shell gland/vagina regions increased from  $21.7\pm 4.5\%$  to  $34.2\pm 2.9\%$ , respectively.

First-laid eggs were significantly lighter than last-laid eggs for females laying  $\geq 4$  eggs ( $1.042\pm 0.115$  g vs.  $1.093\pm 0.083$  g,

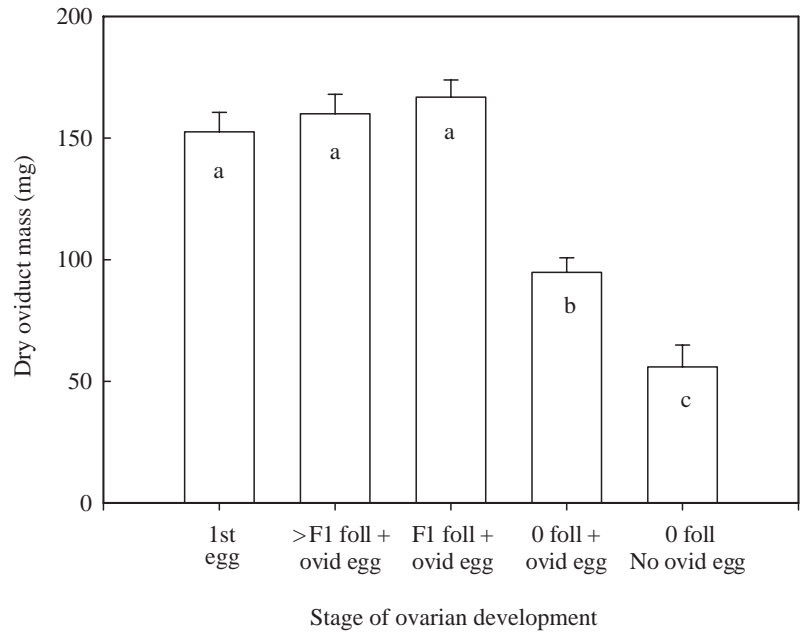

Fig. 1. Variation in dry oviduct mass (mg) during the laying cycle in female zebra finches in relation to stage of ovarian development. 1st egg, day first egg was laid; F1 foll, one or more yolky follicles present; 0 foll, no remaining yolky follicles; ovid egg, oviductal egg present. Columns sharing the same letter are not significantly different ( $P>0.05$ ).

paired  $t$ -test,  $t_{23}=2.85$ ,  $P<0.01$ ). There was no difference in the absolute, or relative, dry mass of shell with laying sequence, but late-laid eggs had higher absolute, and relative, albumen content compared with first-laid eggs (Table 1). In contrast, the percentage dry yolk mass was lower in last laid eggs (Table 1).

## Discussion

We predicted that if maintenance of a large oviduct is energetically costly (Vézina and Williams, in press) then oviduct size should be tightly coupled to the functional demands placed on this organ (as reported for other organ systems, e.g. Diamond and Hammond, 1992; Hammond and Diamond, 1994; Hammond et al., 1996). This prediction was supported not just at the whole-organ level (e.g. rapid regression of the oviduct following last oviposition) but also at the intra-organ level, with rapid regression of the proximal

Table 1. Comparison of egg composition for first- and last-laid eggs in female zebra finches laying 4–5 egg clutches

| Egg order | Shell         |                | Albumen        |                  | Yolk           |                 |
|-----------|---------------|----------------|----------------|------------------|----------------|-----------------|
|           | Dry mass (mg) | %              | Dry mass (mg)  | %                | Dry mass (mg)  | %               |
| First     | 60.0 $\pm$ 6  | 25.2 $\pm$ 2.3 | 74.9 $\pm$ 11  | 31.4 $\pm$ 2.9   | 104.8 $\pm$ 21 | 43.4 $\pm$ 4.2  |
| Last      | 62.1 $\pm$ 5  | 24.7 $\pm$ 1.8 | 84.4 $\pm$ 8** | 33.5 $\pm$ 2.4** | 105.7 $\pm$ 14 | 41.8 $\pm$ 2.4* |

Dry mass values are means  $\pm$  s.d. ( $N=23$ ); % values are percentage of total egg dry mass.

Asterisks indicate significant difference: \* $P<0.05$ , \*\* $P<0.01$ .

sections of the oviduct even before the final oviposition. In the ~24 h period after the last follicle was ovulated, but before this egg was laid, the proximal infundibulum/magnum and the isthmus regions decreased by 56% and 38%, respectively. Over the same period there was no change in shell gland/vagina mass, but these sections regressed by 34% in mass in the ~24 h after the last oviposition. This maintenance of the functional capacity of the oviduct until last oviposition is supported by the fact that there was no decrease in absolute or relative mass of oviduct-dependent egg components (shell and albumen) for later-laid eggs.

The pattern of oviduct regression in our study is very different from that reported by Houston et al. (1995), also for

the zebra finch. They suggested that the oviduct reached peak mass at the 1-egg stage but then declined in mass linearly through laying, decreasing from 120 mg to 40 mg (66%) between the 1- and 4-egg stages. Houston et al. (1995) argued that this reflected 'release' of protein from the oviduct for egg formation, i.e. that the oviduct acts as a storage organ. We disagree with this conclusion and suggest that the result of Houston et al. (1995) was an artifact of (1) plotting oviduct mass by egg number (laying sequence), rather than the actual stage of ovarian development, (2) including birds at later stages of egg-laying that had actually completed egg formation, and (3) not using mass-corrected oviduct mass. Indeed, if we analyze our data this way, not accounting for these

confounding factors, we also find an apparent decrease in oviduct mass between the 1- and 4-egg stage (data not shown). Although birds in the study by Houston et al. (1995) were maintained on a low-quality seed diet (in contrast to our study), our data show that diet *per se* does not explain the difference in oviduct mass between studies. Even on a seed-only diet in our study, birds late in laying had oviducts averaging 151 mg, which is much larger than the mean of 30–50 mg reported by Houston et al. (1995). Thus, we believe there is currently no evidence to support a protein storage function for the avian oviduct in relation to egg production (cf. Houston et al., 1995; see also Vézina and Williams, 2003).

The results of our study clearly show that total oviduct mass remains constant during egg-laying as long as there is at least one remaining yolky follicle still to be ovulated and to pass down the oviduct. However, once the last ovulation has occurred there is rapid, and marked, regression of the proximal regions of the oviduct (the infundibulum, magnum and isthmus) as soon as the follicle has passed these regions (within 24 h post-ovulation), but while the distal shell gland region is still processing the oviductal egg. Part of this decrease might be explained by loss of stored secretory products (albumen proteins) from oviductal tissue following the last ovulation. This does not fully explain the differential pattern of oviduct regression we report, but this source of mass loss would still be consistent with rapid downregulation of oviduct function (although in the domestic hen, albumen protein content of the magnum region does not decrease until after cessation of laying; Yu and Marquardt, 1973). Our result is very similar to that reported for laying female European starlings, where oviduct mass also remains constant up to the last ovulation, but then decreases by 50% following this last ovulation in birds with only one oviductal egg remaining (Vézina and Williams, 2003). Thus, in two small passerines, the avian oviduct has a highly regulated

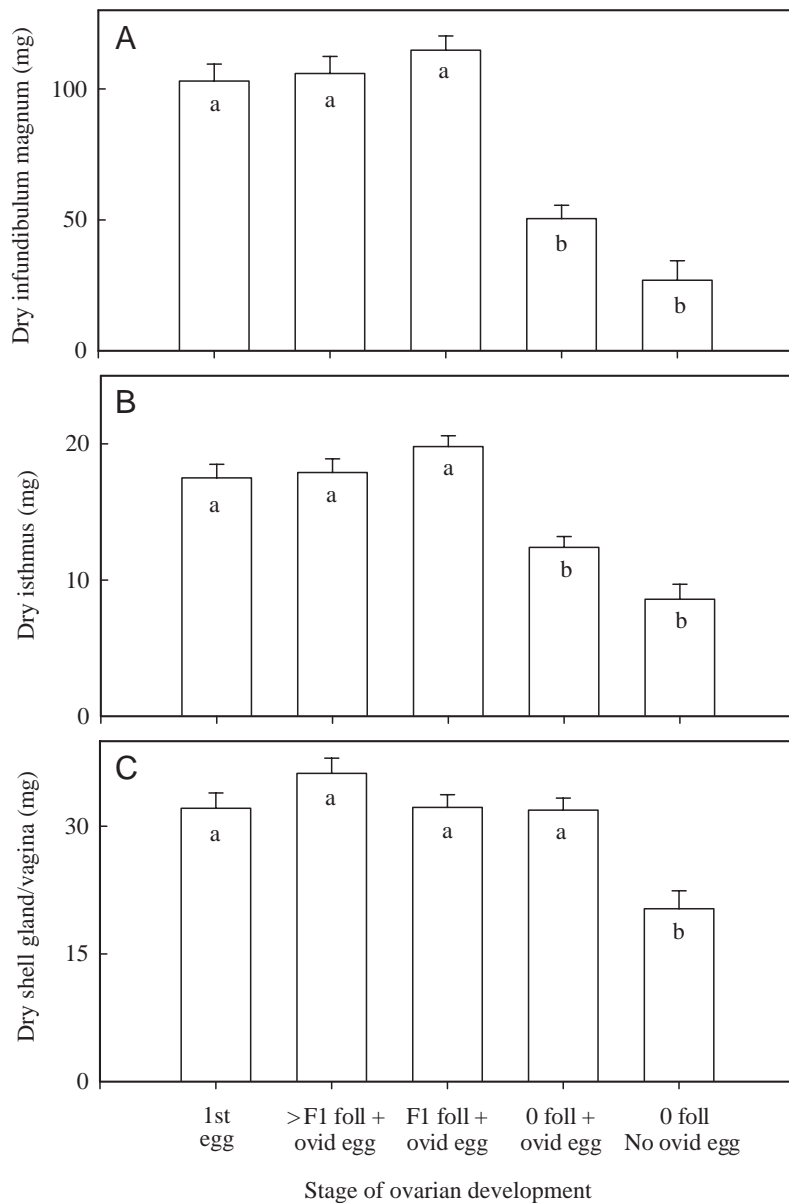

Fig. 2. Variation in dry mass of infundibulum/magnum (A), isthmus (B) and shell gland/vagina (C) during the laying cycle in female zebra finches in relation to stage of ovarian development (as for Fig 1). Columns sharing the same letter are not significantly different ( $P > 0.05$ ).

size–function relationship consistent with a high energy cost of maintenance for this organ (i.e. high levels of cellular secretory activity). This interpretation is supported by the observation that individual variation in residual RMR in European starlings during egg-laying is positively related to oviduct mass but not to other organs (Vézina and Williams, 2003). There appears to be little known about the specific mechanisms involved in oviduct regression, but our study suggests that these mechanisms must be specific to each region of the oviduct (e.g. differential timing of receptor expression) rather than involving a more generic, humoral signal such as downregulation of plasma estrogen or progesterone levels (Burley and Vadehra, 1989). Although we did not investigate the growth phase, Yu and Marquardt (1973) showed that the rate of growth of the magnum during oviduct development is much greater than that of more distal sections of the oviduct, i.e. the pattern of growth also closely reflects functional demands.

Although maintenance of a large oviduct would appear to be costly, there are likely advantages to having a large oviduct in terms of both the quantity, and potentially the quality, of egg albumen. Albumen protein content of eggs is positively related to oviduct mass (Christians and Williams, 1999), and this might be important for offspring fitness in terms of structural growth of the offspring (Williams, 1994; Finkler et al., 1998). In addition, several recent studies have suggested that maternal effects might include transfer of immunoglobulins and antibacterial factors from mother to offspring in egg albumen (Saino et al., 2001, 2002); thus, oviduct size/function might play a role in mediating these maternal effects. Nevertheless, we consider it unlikely that oviduct size determines egg size, *via* albumen content, independently of ovarian factors that determine yolk size (Williams et al., 2001). Rather, it seems more likely that high quality birds which produce large yolks must also be able to sustain the high costs of oviduct function to deposit the appropriate amount of albumen required by yolks of a particular size. It is clear that animals possess considerable phenotypic flexibility in body composition, undergoing reversible changes in organ size, e.g. in relation to migration (Battley et al., 2000; Guglielmo and Williams, 2003) or reproduction (Vézina and Williams, 2003). However, in general these studies have focussed on modulation at the whole-organ level. We suggest that the type of intra-organ structure–function relationship documented here for the avian oviduct might also occur in other linear organs with high maintenance energy costs where there is temporal separation of function, e.g. in digestive tracts with prolonged passage times (Secor and Diamond, 1997).

This work was funded by a Natural Sciences and Engineering Research Council of Canada (NSERC) Discovery Grant to T.D.W. and an NSERC Undergraduate Student Research Award to C.E.A. We thank Francois Vézina for providing the initial stimulus for this work and he and Katrina Salvante for comments on an earlier draft.

## References

- Bakst, M. R.** (1998). Structure of the avian oviduct with emphasis on sperm storage in poultry. *J. Exp. Zool.* **282**, 618–626.
- Battley, P. F., Piersma, T., Dietz, M. W., Tang, S., Dekinga, A. and Hulsman, K.** (2000). Empirical evidence for differential organ reductions during trans-oceanic bird flight. *Proc. R. Soc. Lond. B* **267**, 191–195.
- Burley, R. W. and Vadehra, D. V.** (1989). *The Avian Egg: Chemistry and Biology*. New York: John Wiley and Sons.
- Carey, C.** (1996). *Avian Energetics and Nutritional Ecology*. New York: Chapman and Hall.
- Challenger, W. O., Williams, T. D., Christians, J. K. and Vézina, F.** (2001). Follicular development and plasma yolk precursor dynamics through the laying cycle in the European starling (*Sturnus vulgaris*). *Physiol. Biochem. Zool.* **74**, 356–365.
- Chappell, M. A., Bech, C. and Buttemer, W. A.** (1999). The relationship of central and peripheral organ masses to aerobic performance variation in house sparrows. *J. Exp. Biol.* **202**, 2269–2279.
- Christians, J. K.** (1999). Controlling for body mass effects: is part-whole correlation important? *Physiol. Biochem. Zool.* **72**, 250–253.
- Christians, J. K. and Williams, T. D.** (1999). Organ mass dynamics in relation to yolk precursor production and egg formation in European starlings *Sturnus vulgaris*. *Physiol. Biochem. Zool.* **72**, 455–461.
- Christians, J. K. and Williams, T. D.** (2001). Interindividual variation in yolk mass and the rate of growth of ovarian follicles in the zebra finch (*Taeniopygia guttata*). *J. Comp. Physiol. B* **171**, 255–261.
- Diamond, J. and Hammond, K.** (1992). The matches, achieved by natural selection between biological capacities and their natural loads. *Experientia* **48**, 551–557.
- Etches, R. J.** (1996). *Reproduction in Poultry*. Wallingford, CAB International.
- Finkler, M. S., van Orman, J. B. and Sotherland, P. R.** (1998). Experimental manipulation of egg quality in chickens: influence of albumen and yolk on the size and body composition of near-term embryos in a precocial bird. *J. Comp. Physiol. B* **168**, 17–24.
- Guglielmo, C. and Williams, T. D.** (2003). Phenotypic flexibility of body composition in relation to migratory state, age and sex in the western sandpiper (*Calidris mauri*). *Physiol. Biochem. Zool.* **76**, 84–98.
- Hammond, K. A. and Diamond, J. M.** (1994). Limits to nutrient intake and intestinal nutrient uptake capacity during extended lactation. *Physiol. Zool.* **67**, 282–303.
- Hammond, K. A., Lloyd, K. C. and Diamond, J.** (1996). Is mammary output capacity limiting to lactational performance in mice? *J. Exp. Biol.* **199**, 337–349.
- Houston, D. C., Donnan, D. and Jones, P. J.** (1995b). The source of the nutrients required for egg production in zebra finches *Poephila guttata*. *J. Zool. Lond.* **235**, 469–483.
- King, A. S. and McLelland, J.** (1984). *Birds, their Structure and Function*. 2nd edn. London: Bailliere Tindall.
- Monaghan, P. and Nager, R. G.** (1997). Why don't birds lay more eggs? *Trends Ecol. Evol.* **12**, 270–274.
- Muller, W., Eising, C. M., Dijkstra, C. and Groothuis, T. G. G.** (2002). Sex differences in yolk hormones depend on maternal status in Leghorn chickens (*Gallus gallus domesticus*). *Proc. R. Soc. Lond. B* **269**, 2249–2255.
- Nager, R. G., Monaghan, P. and Houston, D. C.** (2000). Within-clutch trade-offs between the number and quality of eggs: experimental manipulations in gulls. *Ecology* **81**, 1339–1350.
- Nilsson, J.-A. and Raberg, L.** (2001). The resting metabolic cost of egg laying and nestling feeding in great tits. *Oecologia* **128**, 187–192.
- Palmer, B. D. and Guillet, L. J., Jr** (1988). Histology and morphology of the female reproductive tract of the tortoise *Gopherus polyphemus*. *Am. J. Anat.* **183**, 200–211.
- Saino, N., Martinelli, R. and Moller, A. P.** (2001). Immunoglobulin plasma concentration in relation to egg laying and male ornamentation of female barn swallows (*Hirundo rustica*). *J. Evol. Biol.* **14**, 95–109.
- Saino, N., Dall'ara, P., Martinelli, R. and Moller, A. P.** (2002). Early maternal effects and antibacterial immune factors in the eggs, nestlings and adults of the barn swallow. *J. Evol. Biol.* **15**, 735–743.
- Schwabl, H.** (1993). Yolk is a source of maternal testosterone for developing birds. *Proc. Natl. Acad. Sci. USA* **90**, 11446–11450.
- Schwabl, H.** (1996). Maternal testosterone in the avian egg enhances postnatal growth. *Comp. Biochem. Physiol.* **114A**, 271–276.
- Secor, S. M. and Diamond, J.** (1997). Effects of meal size on postprandial responses in juvenile Burmese pythons (*Python molurus*). *Am. J. Physiol.* **272**, R902–912.

- Solomon, S. E.** (1983). Oviduct. In *Physiology and Biochemistry of the Domestic Fowl* Vol. 4 (ed. B. Freeman), pp. 379-419. London: Academic Press.
- Stevenson, I. R. and Bryant, D. M.** (2000). Climate change and constraints on breeding. *Nature* **406**, 366-367.
- Vézina, F. and Williams, T. D.** (2002). Metabolic costs of egg production in the European starling (*Sturnus vulgaris*). *Physiol. Biochem. Zool.* **75**, 377-385.
- Vézina, F. and Williams, T. D.** (2003). Plasticity in body composition in breeding birds: what drives the metabolic costs of egg production? *Physiol. Biochem. Zool.* **76**, in press.
- Visser, M. E. and Lessells, C. M.** (2001). The costs of egg production and incubation in great tits (*Parus major*). *Proc. R. Soc. Lond. B* **268**, 1271-1277.
- Williams, T. D.** (1994). Intraspecific variation in egg-size and egg composition in birds: effects on offspring fitness. *Biol. Rev.* **68**, 35-59.
- Williams, T. D., Hill, W. L. and Walzem, R. L.** (2001). Egg size variation: mechanisms and hormonal control. In *Avian Endocrinology* (ed. A. S. Dawson and C. M. Chatruverdi), pp. 205-217. New Delhi: Narosa Publishing House.
- Yu, J. Y.-L. and Marquardt, R. R.** (1973). Development, cellular growth, and function of the avian oviduct. *Biol. Reprod.* **8**, 283-298.
